# Supplementary material
Source: MDPI journal article supplement (https://www.mdpi.com/2073-4441/12/10/2878)
Supplement: s1 [file s1]

**Supplementary.** The list of 90 RHESSys-related papers

**Table S1.** Representative papers for six research topics

| Topic                | Representative Papers |
|----------------------|-----------------------|
| Climate change       | [1–5]                 |
| Disturbance          | [6–10]                |
| Urbanization         | [11–15]               |
| Land management      | [16–20]               |
| Water quality        | [21–24]               |
| Biogeochemical cycle | [25–28]               |

- (1) Band, L.E.; Mackay, D.S.; Creed, I.F.; Semkin, R.; Jeffries, D. Ecosystem processes at the watershed scale: Sensitivity to potential climate change. *Limnology and Oceanography* 1996, 41 (5), 928-938.
- (2) Fagre, D.B.; Comanor, P.L.; White, J.D.; Hauer, F.R.; Running, S.W. Watershed responses to climate change at Glacier National Park. *Journal of the American Water Resources Association* 1997, 33 (4), 755-765.
- (3) Liu, M.; Rajagopalan, K.; Chung, S.H.; Jiang, X.; Harrison, J.; Nergui, T.; Guenther, A.; Miller, C., et al. What is the importance of climate model bias when projecting the impacts of climate change on land surface processes? *Biogeosciences* 2014, 11 (10), 2601-2622.
- (4) Mohammed, I.N.; Bombliès, A.; Wemple, B.C. The use of CMIP5 data to simulate climate change impacts on flow regime within the Lake Champlain Basin. *Journal of Hydrology-Regional Studies* 2015, 3, 160-186.
- (5) Shin, H.; Park, M.; Lee, J.; Lim, H.; Kim, S.J. Evaluation of the effects of climate change on forest watershed hydroecology using the RHESSys model: Seolmacheon catchment. *Paddy and Water Environment* 2019, 17 (4), 581-595.
- (6) Hwang, T.; Band, L.E.; Hales, T.C.; Miniati, C.F.; Vose, J.M.; Bolstad, P.V.; Miles, B.; Price, K. Simulating vegetation controls on hurricane-induced shallow landslides with a distributed ecohydrological model. *Journal of Geophysical Research-Biogeosciences* 2015, 120 (2), 361-378.
- (7) Hanan, E.J.; Tague, C.; Schimel, J.P. Nitrogen cycling and export in California chaparral: the role of climate in shaping ecosystem responses to fire. *Ecological Monographs* 2017, 87 (1), 76-90.
- (8) Kennedy, M.C.; McKenzie, D.; Tague, C.; Dugger, A.L. Balancing uncertainty and complexity to incorporate fire spread in an eco-hydrological model. *International Journal of Wildland Fire* 2017, 26 (8), 706-718.
- (9) Hanan, E.J.; Tague, C.; Choate, J.; Liu, M.; Kolden, C.; Adam, J. Accounting for disturbance history in models: using remote sensing to constrain carbon and nitrogen pool spin-up. *Ecol. Appl.* 2018, 28 (5), 1197-1214.
- (10) Boisramé, G.F.S.; Thompson, S.E.; Tague, C.; Stephens, S.L. Restoring a Natural Fire Regime Alters the Water Balance of a Sierra Nevada Catchment. *Water Resources Research* 2019, 55 (7), 5751-5769.
- (11) Tague, C.; Band, L. Simulating the impact of road construction and forest harvesting on hydrologic response. *Earth Surf. Process. Landf.* 2001, 26 (2), 135-151.
- (12) Shields, C.; Tague, C. Ecohydrology in semiarid urban ecosystems: Modeling the relationship between connected impervious area and ecosystem productivity. *Water Resources Research* 2015, 51 (1), 302-319.
- (13) Sarkar, S.; Butcher, J.B.; Johnson, T.E.; Clark, C.M. Simulated Sensitivity of Urban Green Infrastructure Practices to Climate Change. *Earth Interact* 2018, 22 (13), 1-37.

- (14) Bell, C.D.; Tague, C.L.; McMillan, S.K. Modeling Runoff and Nitrogen Loads From a Watershed at Different Levels of Impervious Surface Coverage and Connectivity to Storm Water Control Measures. *Water Resources Research* 2019, 55 (4), 2690-2707.
- (15) Leonard, L.; Miles, B.; Heidari, B.; Lin, L.; Castronova, A.M.; Minsker, B.; Lee, J.; Scaife, C., et al. Development of a participatory Green Infrastructure design, visualization and evaluation system in a cloud supported jupyter notebook computing environment. *Environmental Modelling & Software* 2019, 111, 121-133.
- (16) Lopez-Moreno, J.I.; Zabalza, J.; Vicente-Serrano, S.M.; Revuelto, J.; Gilaberte, M.; Azorin-Molina, C.; Moran-Tejeda, E.; Garcia-Ruiz, J.M., et al. Impact of climate and land use change on water availability and reservoir management: scenarios in the Upper Aragon River, Spanish Pyrenees. *Sci Total Environ* 2014, 493, 1222-31.
- (17) Peng, H.; Jia, Y.W.; Tague, C.; Slaughter, P. An Eco-Hydrological Model-Based Assessment of the Impacts of Soil and Water Conservation Management in the Jinghe River Basin, China. *Water* 2015, 7 (11), 6301-6320.
- (18) Peng, H.; Tague, C.; Jia, Y.W. Evaluating the eco-hydrologic impacts of reforestation in the Loess Plateau, China, using an eco-hydrologic model. *Ecohydrology* 2016, 9 (3), 498-513.
- (19) Martin, K.L.; Hwang, T.; Vose, J.M.; Coulston, J.W.; Wear, D.N.; Miles, B.; Band, L.E. Watershed impacts of climate and land use changes depend on magnitude and land use context. *Ecohydrology* 2017, 10 (7).
- (20) Gorelick, D.E.; Lin, L.; Zeff, H.B.; Kim, Y.; Vose, J.M.; Coulston, J.W.; Wear, D.N.; Band, L.E., et al. Accounting for Adaptive Water Supply Management When Quantifying Climate and Land Cover Change Vulnerability. *Water Resources Research* 2020, 56 (1), 27.
- (21) Tague, C.; McMichael, C.; Hope, A.; Choate, J.; Clark, R. Application of the RHESSys model to a California semiarid shrubland watershed. *Journal of the American Water Resources Association* 2004, 40 (3), 575-589.
- (22) Tague, C. Modeling hydrologic controls on denitrification: sensitivity to parameter uncertainty and landscape representation. *Biogeochemistry* 2009, 93 (1-2), 79-90.
- (23) Bell, C.D.; Tague, C.L.; McMillan, S.K. A model of hydrology and water quality for stormwater control measures. *Environmental Modelling & Software* 2017, 95, 29-47.
- (24) Son, K.; Lin, L.; Band, L.; Owens, E.M. Modelling the interaction of climate, forest ecosystem, and hydrology to estimate catchment dissolved organic carbon export. *Hydrological Processes* 2019, 33 (10), 1448-1464.
- (25) Creed, I.F.; Band, L.E.; Foster, N.W.; Morrison, I.K.; Nicolson, J.A.; Semkin, R.S.; Jeffries, D.S. Regulation of nitrate-N release from temperate forests: A test of the N flushing hypothesis. *Water Resources Research* 1996, 32 (11), 3337-3354.
- (26) Morales, P.; Sykes, M.T.; Prentice, I.C.; Smith, P.; Smith, B.; Bugmann, H.; Zierl, B.; Friedlingstein, P., et al. Comparing and evaluating process-based ecosystem model predictions of carbon and water fluxes in major European forest biomes. *Global Change Biology* 2005, 11 (12), 2211-2233.
- (27) Zierl, B.; Bugmann, H. Sensitivity of carbon cycling in the European Alps to changes of climate and land cover. *Climatic Change* 2007, 85 (1-2), 195-212.
- (28) Zierl, B.; Bugmann, H.; Tague, C.L. Water and carbon fluxes of European ecosystems: An evaluation of the ecohydrological model RHESSys. *Hydrological Processes* 2007, 21 (24), 3328-3339.
- (29) Band, L.E.; Patterson, P.; Nemani, R.; Running, S.W. Forest Ecosystem Processes at the Watershed Scale - Incorporating Hillslope Hydrology. *Agricultural and Forest Meteorology* 1993, 63 (1-2), 93-126.

- (30) Nemani, R.; Pierce, L.; Running, S.; Band, L. Forest Ecosystem Processes at the Watershed Scale - Sensitivity to Remotely-Sensed Leaf-Area Index Estimates. *International Journal of Remote Sensing* 1993, 14 (13), 2519-2534.
- (31) White, J.D.; Running, S.W. Testing Scale-Dependent Assumptions in Regional Ecosystem Simulations. *Journal of Vegetation Science* 1994, 5 (5), 687-702.
- (32) Robinson, V.B.; Mackay, D.S. Semantic modeling for the integration of geographic information and regional hydroecological simulation management. *Comput. Environ. Urban Syst.* 1995, 19 (5-6), 321-339.
- (33) Coughlan, J.C.; Running, S.W. Regional ecosystem simulation: A general model for simulating snow accumulation and melt in mountainous terrain. *Landscape Ecology* 1997, 12 (3), 119-136.
- (34) Mackay, D.S.; Band, L.E. Forest ecosystem processes at the watershed scale: Dynamic coupling of distributed hydrology and canopy growth. *Hydrological Processes* 1997, 11 (9), 1197-1217.
- (35) Baron, J.S.; Hartman, M.D.; Kittel, T.G.F.; Band, L.E.; Ojima, D.S.; Lammers, R.B. Effects of land cover, water redistribution, and temperature on ecosystem processes in the South Platte Basin. *Ecological Applications* 1998, 8 (4), 1037-1051.
- (36) Creed, I.F.; Band, L.E. Exploring functional similarity in the export of nitrate-N from forested catchments: A mechanistic modeling approach. *Water Resources Research* 1998, 34 (11), 3079-3093.
- (37) Hartman, M.D.; Baron, J.S.; Lammers, R.B.; Cline, D.W.; Band, L.E.; Liston, G.E.; Tague, C. Simulations of snow distribution and hydrology in a mountain basin. *Water Resources Research* 1999, 35 (5), 1587-1603.
- (38) Baron, J.S.; Hartman, M.D.; Band, L.E.; Lammers, R.B. Sensitivity of a high-elevation Rocky Mountain watershed to altered climate and CO<sub>2</sub>. *Water Resources Research* 2000, 36 (1), 89-99.
- (39) Band, L.E.; Tague, C.L.; Groffman, P.; Belt, K. Forest ecosystem processes at the watershed scale: hydrological and ecological controls of nitrogen export. *Hydrological Processes* 2001, 15 (10), 2013-2028.
- (40) Meentemeyer, R.K.; Moody, A.; Franklin, J. Landscape-scale patterns of shrub-species abundance in California chaparral - The role of topographically mediated resource gradients. *Plant Ecology* 2001, 156 (1), 19-41.
- (41) Tague, C.L.; Band, L.E. Evaluating explicit and implicit routing for watershed hydro-ecological models of forest hydrology at the small catchment scale. *Hydrological Processes* 2001, 15 (8), 1415-1439.
- (42) Meentemeyer, R.K.; Moody, A. Distribution of plant life history types in California chaparral: the role of topographically-determined drought severity. *Journal of Vegetation Science* 2002, 13 (1), 67-78.
- (43) Samanta, S.; Mackay, D.S. Flexible automated parameterization of hydrologic models using fuzzy logic. *Water Resources Research* 2003, 39 (1).
- (44) Tague, C.L.; Band, L.E. RHESSys: Regional Hydro-Ecologic Simulation System-An Object-Oriented Approach to Spatially Distributed Modeling of Carbon, Water, and Nutrient Cycling. *Earth Interactions* 2004, 8.
- (45) Quinn, T.; Zhu, A.X.; Burt, J.E. Effects of detailed soil spatial information on watershed modeling across different model scales. *International Journal of Applied Earth Observation and Geoinformation* 2005, 7 (4), 324-338.
- (46) Zierl, B.; Bugmann, H. Global change impacts on hydrological processes in Alpine catchments. *Water Resources Research* 2005, 41 (2).
- (47) Cooper, D.J.; Dickens, J.; Hobbs, N.T.; Christensen, L.; Landrum, L. Hydrologic, geomorphic and climatic processes controlling willow establishment in a montane ecosystem. *Hydrological Processes* 2006, 20 (8), 1845-1864.

- (48) Sanford, S.E.; Creed, I.F.; Tague, C.L.; Beall, F.D.; Buttle, J.M. Scale-dependence of natural variability of flow regimes in a forested landscape. *Water Resources Research* 2007, 43 (8).
- (49) Tague, C.; Grant, G.; Farrell, M.; Choate, J.; Jefferson, A. Deep groundwater mediates streamflow response to climate warming in the Oregon Cascades. *Climatic Change* 2007, 86 (1-2), 189-210.
- (50) Christensen, L.; Tague, C.L.; Baron, J.S. Spatial patterns of simulated transpiration response to climate variability in a snow dominated mountain ecosystem. *Hydrological Processes* 2008, 22 (18), 3576-3588.
- (51) Hwang, T.; Kangw, S.; Kim, J.; Kim, Y.; Lee, D.; Band, L. Evaluating drought effect on MODIS Gross Primary Production (GPP) with an eco-hydrological model in the mountainous forest, East Asia. *Global Change Biology* 2008, 14 (5), 1037-1056.
- (52) Jefferson, A.; Nolin, A.; Lewis, S.; Tague, C. Hydrogeologic controls on streamflow sensitivity to climate variation. *Hydrological Processes* 2008, 22 (22), 4371-4385.
- (53) Tague, C.; Pohl-Costello, M. The Potential Utility of Physically Based Hydrologic Modeling in Ungauged Urban Streams. *Annals of the Association of American Geographers* 2008, 98 (4), 818-833.
- (54) Hwang, T.; Band, L.; Hales, T.C. Ecosystem processes at the watershed scale: Extending optimality theory from plot to catchment. *Water Resources Research* 2009, 45 (11).
- (55) Tague, C.; Grant, G.E. Groundwater dynamics mediate low-flow response to global warming in snow-dominated alpine regions. *Water Resources Research* 2009, 45 (7).
- (56) Tague, C.; Heyn, K.; Christensen, L. Topographic controls on spatial patterns of conifer transpiration and net primary productivity under climate warming in mountain ecosystems. *Ecohydrology* 2009, 2 (4), 541-554.
- (57) Tague, C.; Seaby, L.; Hope, A. Modeling the eco-hydrologic response of a Mediterranean type ecosystem to the combined impacts of projected climate change and altered fire frequencies. *Climatic Change* 2009, 93 (1-2), 137-155.
- (58) Meyers, E.M.; Dobrowski, B.; Tague, C.L. Climate Change Impacts on Flood Frequency, Intensity, and Timing May Affect Trout Species in Sagehen Creek, California. *Transactions of the American Fisheries Society* 2010, 139 (6), 1657-1664.
- (59) Hwang, T.; Band, L.E.; Vose, J.M.; Tague, C. Ecosystem processes at the watershed scale: Hydrologic vegetation gradient as an indicator for lateral hydrologic connectivity of headwater catchments. *Water Resources Research* 2012, 48 (6).
- (60) Mittman, T.; Band, L.E.; Hwang, T.; Smith, M.L. Distributed Hydrologic Modeling in the Suburban Landscape: Assessing Parameter Transferability from Gauged Reference Catchments. *Journal of the American Water Resources Association* 2012, 48 (3), 546-557.
- (61) Garcia, E.S.; Tague, C.L.; Choate, J.S. Influence of spatial temperature estimation method in ecohydrologic modeling in the Western Oregon Cascades. *Water Resources Research* 2013, 49 (3), 1611-1624.
- (62) Grant, G.E.; Tague, C.L.; Allen, C.D. Watering the forest for the trees: an emerging priority for managing water in forest landscapes. *Frontiers in Ecology and the Environment* 2013, 11 (6), 314-321.
- (63) Tague, C.; Peng, H. The sensitivity of forest water use to the timing of precipitation and snowmelt recharge in the California Sierra: Implications for a warming climate. *Journal of Geophysical Research-Biogeosciences* 2013, 118 (2), 875-887.
- (64) Tague, C.L.; Choate, J.S.; Grant, G. Parameterizing sub-surface drainage with geology to improve modeling streamflow responses to climate in data limited environments. *Hydrology and Earth System Sciences* 2013, 17 (1), 341-354.

- (65) Tague, C.L.; McDowell, N.G.; Allen, C.D. An integrated model of environmental effects on growth, carbohydrate balance, and mortality of *Pinus ponderosa* forests in the southern Rocky Mountains. *PLoS ONE* 2013, 8 (11), e80286.
- (66) Godsey, S.E.; Kirchner, J.W.; Tague, C.L. Effects of changes in winter snowpacks on summer low flows: case studies in the Sierra Nevada, California, USA. *Hydrological Processes* 2014, 28 (19), 5048-5064.
- (67) Mohammed, I.N.; Tarboton, D.G. Simulated watershed responses to land cover changes using the Regional Hydro-Ecological Simulation System. *Hydrological Processes* 2014, 28 (15), 4511-4528.
- (68) Mullis, T.; Liu, M.; Kalyanaraman, A.; Vaughan, J.; Tague, C.; Adam, J., Design and Implementation of Kepler Workflows for BioEarth. In 2014 International Conference on Computational Science, Abramson, D.; Lees, M.; Krzhizhanovskaya, V. V.; Dongarra, J.; Sloot, P. M. A., Eds. 2014; Vol. 29, pp 1722-1732.
- (69) Tang, G.; Hwang, T.; Pradhanang, S.M. Does consideration of water routing affect simulated water and carbon dynamics in terrestrial ecosystems? *Hydrology and Earth System Sciences* 2014, 18 (4), 1423-1437.
- (70) Garcia, E.S.; Tague, C.L. Subsurface storage capacity influences climate-evapotranspiration interactions in three western United States catchments. *Hydrology and Earth System Sciences* 2015, 19 (12), 4845-4858.
- (71) Lin, L.; Webster, J.R.; Hwang, T.; Band, L.E. Effects of lateral nitrate flux and instream processes on dissolved inorganic nitrogen export in a forested catchment: A model sensitivity analysis. *Water Resources Research* 2015, 51 (4), 2680-2695.
- (72) Morán-Tejeda, E.; Zabalza, J.; Rahman, K.; Gago-Silva, A.; López-Moreno, J.I.; Vicente-Serrano, S.; Lehmann, A.; Tague, C.L., et al. Hydrological impacts of climate and land-use changes in a mountain watershed: uncertainty estimation based on model comparison. *Ecohydrology* 2015, 8 (8), 1396-1416.
- (73) Vicente-Serrano, S.M.; Camarero, J.J.; Zabalza, J.; Sanguesa-Barreda, G.; Lopez-Moreno, J.I.; Tague, C.L. Evapotranspiration deficit controls net primary production and growth of silver fir: Implications for Circum-Mediterranean forests under forecasted warmer and drier conditions. *Agricultural and Forest Meteorology* 2015, 206, 45-54.
- (74) Bart, R.R.; Tague, C.L.; Moritz, M.A. Effect of Tree-to-Shrub Type Conversion in Lower Montane Forests of the Sierra Nevada (USA) on Streamflow. *PLoS ONE* 2016, 11 (8), e0161805.
- (75) Son, K.; Tague, C.; Hunsaker, C. Effects of Model Spatial Resolution on Ecohydrologic Predictions and Their Sensitivity to Inter-Annual Climate Variability. *Water* 2016, 8 (8).
- (76) Tang, G.P.; Carroll, R.W.H.; Lutz, A.; Sun, L. Regulation of precipitation-associated vegetation dynamics on catchment water balance in a semiarid and arid mountainous watershed. *Ecohydrology* 2016, 9 (7), 1248-1262.
- (77) Zia, A.; Bombliès, A.; Schroth, A.W.; Koliba, C.; Isles, P.D.F.; Tsai, Y.; Mohammed, I.N.; Bucini, G., et al. Coupled impacts of climate and land use change across a river-lake continuum: insights from an integrated assessment model of Lake Champlain's Missisquoi Basin, 2000-2040. *Environmental Research Letters* 2016, 11 (11).
- (78) Bart, R.R.; Tague, C.L.; Dennison, P.E. Modeling annual grassland phenology along the central coast of California. *Ecosphere* 2017, 8 (7), 14.
- (79) Kim, J.; Hwang, T.; Schaaf, C.L.; Orwig, D.A.; Boose, E.; Munger, J.W. Increased water yield due to the hemlock woolly adelgid infestation in New England. *Geophysical Research Letters* 2017, 44 (5), 2327-2335.

- (80) Reyes, J.J.; Tague, C.L.; Evans, R.D.; Adam, J.C. Assessing the Impact of Parameter Uncertainty on Modeling Grass Biomass Using a Hybrid Carbon Allocation Strategy. *Journal of Advances in Modeling Earth Systems* 2017, 9 (8), 2968-2992.
- (81) Saksa, P.C.; Conklin, M.H.; Battles, J.J.; Tague, C.L.; Bales, R.C. Forest thinning impacts on the water balance of Sierra Nevada mixed-conifer headwater basins. *Water Resources Research* 2017, 53 (7), 5364-5381.
- (82) Hwang, T.; Martin, K.L.; Vose, J.M.; Wear, D.; Miles, B.; Kim, Y.; Band, L.E. Nonstationary Hydrologic Behavior in Forested Watersheds Is Mediated by Climate-Induced Changes in Growing Season Length and Subsequent Vegetation Growth. *Water Resources Research* 2018, 54 (8), 5359-5375.
- (83) Kim, J.H.; Hwang, T.; Yang, Y.; Schaaf, C.L.; Boose, E.; Munger, J.W. Warming-Induced Earlier Greenup Leads to Reduced Stream Discharge in a Temperate Mixed Forest Catchment. *Journal of Geophysical Research-Biogeosciences* 2018, 123 (6), 1960-1975.
- (84) Zabalza-Martinez, J.; Vicente-Serrano, S.M.; Lopez-Moreno, J.I.; Calvo, G.B.; Save, R.; Pascual, D.; Pla, E.; Moran-Tejeda, E., et al. The Influence of Climate and Land-Cover Scenarios on Dam Management Strategies in a High Water Pressure Catchment in Northeast Spain. *Water* 2018, 10 (11).
- (85) Kyongho, S.; Tague, C. A top-down soil moisture and sap flux sampling design of a rain-snow transition mountain watershed. *Hydrological Processes* 2019, 33 (11), 1553-1568.
- (86) Lin, L.; Band, L.E.; Vose, J.M.; Hwang, T.; Miniati, C.F.; Bolstad, P.V. Ecosystem processes at the watershed scale: Influence of flowpath patterns of canopy ecophysiology on emergent catchment water and carbon cycling. *Ecohydrology* 2019, 12 (5).
- (87) Rai, A.; Minsker, B.; Sullivan, W.; Band, L. A novel computational green infrastructure design framework for hydrologic and human benefits. *Environmental Modelling & Software* 2019, 118, 252-261.
- (88) Son, K.; Tague, C. Hydrologic responses to climate warming for a snow-dominated watershed and a transient snow watershed in the California Sierra. *Ecohydrology* 2019, 12 (1).
- (89) Tashie, A.; Scaife, C.L.; Band, L.E. Transpiration and subsurface controls of streamflow recession characteristics. *Hydrological Processes* 2019, 33 (19), 2561-2575.
- (90) Tsamir, M.; Gottlieb, S.; Preisler, Y.; Rotenberg, E.; Tatarinov, F.; Yakir, D.; Tague, C.; Klein, T. Stand density effects on carbon and water fluxes in a semi-arid forest, from leaf to stand-scale. *Forest Ecology and Management* 2019, 453.
